# Supplementary material for: Inhibiting miR-195-5p Induces Proliferation of Human Corneal Endothelial Cells
Source: MDPI journal article supplement (doi:10.3390/ijms241411490), 2023-07-15
Supplement: s1 [file s1]

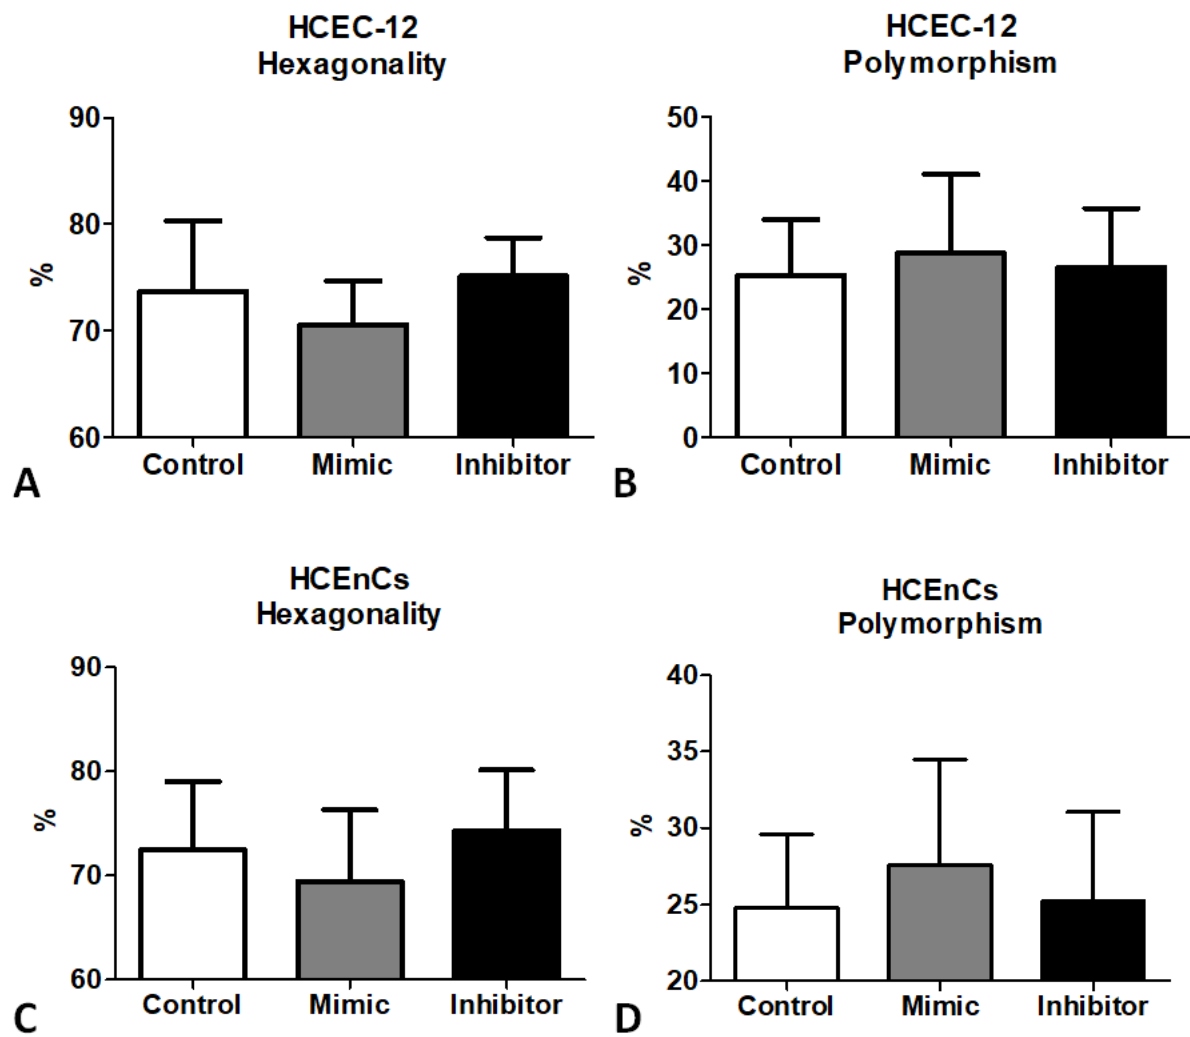

**Supp. Figure S1:** Hexagonality and polymorphism, (A,B) no difference was observed in hexagonality or polymorphism from either group (control, mimic or inhibitor) in HCEC-12 lines or (C,D) in HCEnCs.
